# Supplementary material for: Highly active and reusable silica-aerogel-supported platinum–cobalt bimetallic catalysts for the dehydrogenation of ammonia borane
Source: Royal Society of Chemistry journal article supplement (doi:10.1039/c6ra24249a), 2016-01-01
Supplement: c6ra24249a1.pdf [file c6ra24249a1.pdf]

**Electronic Supplementary Information:**  
**Highly active and reusable silica-aerogel-supported platinum-cobalt bimetallic catalysts for the dehydrogenation of ammonia borane**

*Pin-Ju Yu, Chia-Ching Hsieh<sup>a</sup>, Po-Yu Chen<sup>a</sup>, Biing-Jyh Weng<sup>b</sup>, Yui Whei Chen-Yang\**

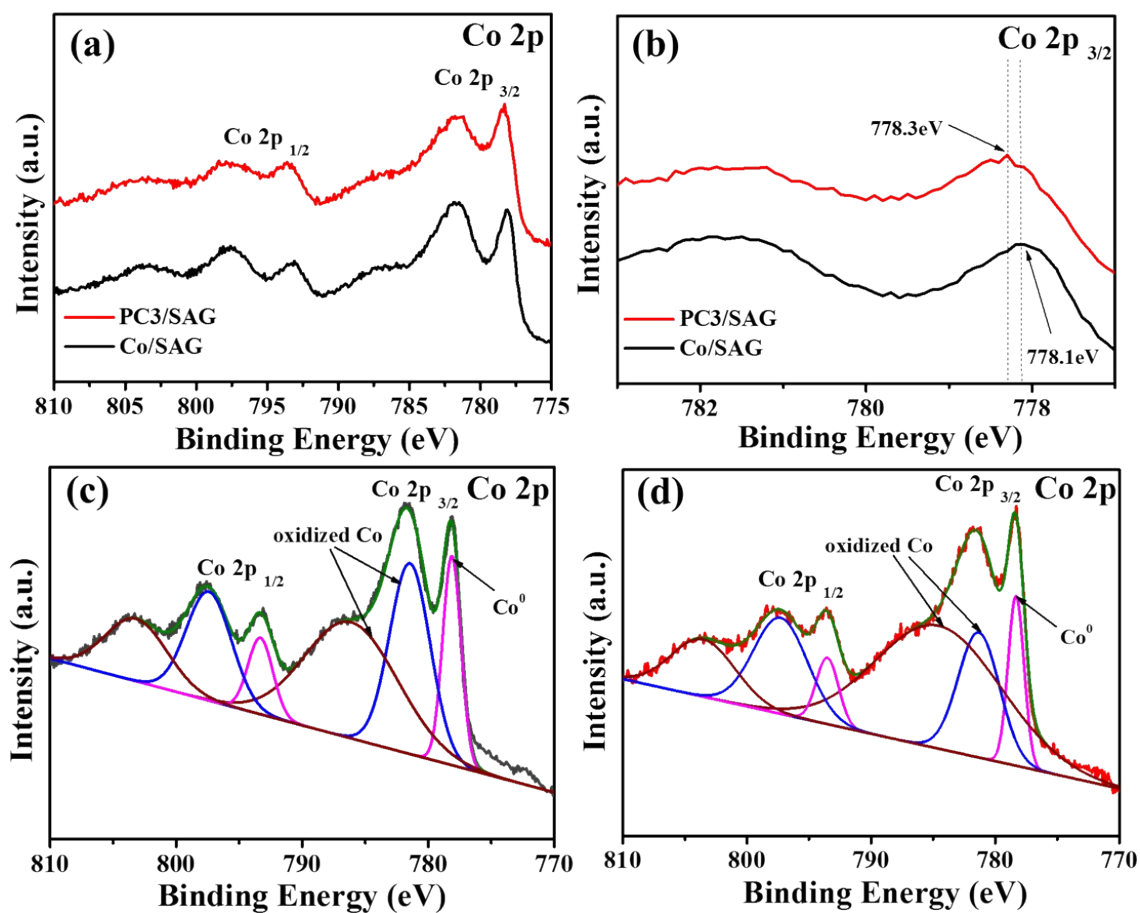

Fig. S1. (a) XPS spectra of Co 2p for Co/SAG and PC3/SAG. (b) Comparison of the Co 2p<sub>3/2</sub> from Co/SAG and PC3/SAG. Deconvoluted Co-2p X-ray photoelectron spectra for (c) Co/SAG and (d) PC3/SAG.
